# Supplementary material for: Glypican-3-Targeted Alpha Particle Therapy for Hepatocellular Carcinoma
Source: PubMed Central journal article supplement (PMC7792624; doi:10.3390/molecules26010004), 2020-12-22
Supplement: molecules-26-00004-s001.pdf [file molecules-26-00004-s001.pdf]

**Supplemental figures:**

**A** GC33-Macropa

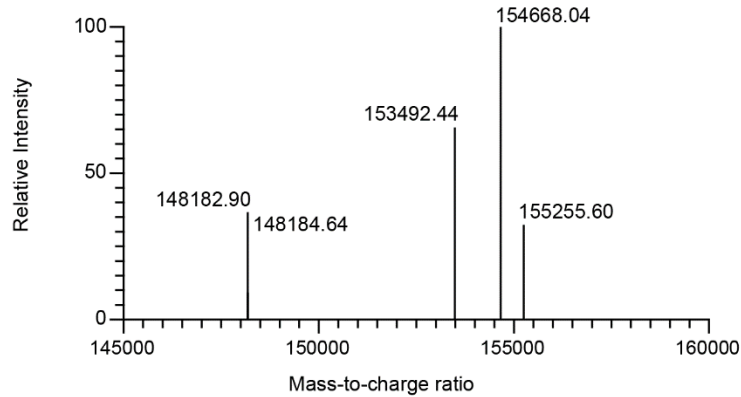

**B** [<sup>225</sup>Ac]Ac-GC33

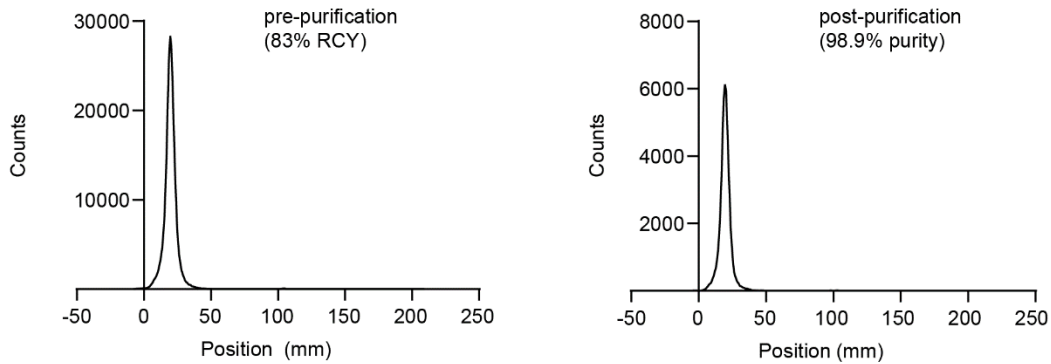

**C** [<sup>225</sup>Ac]Ac-IgG1

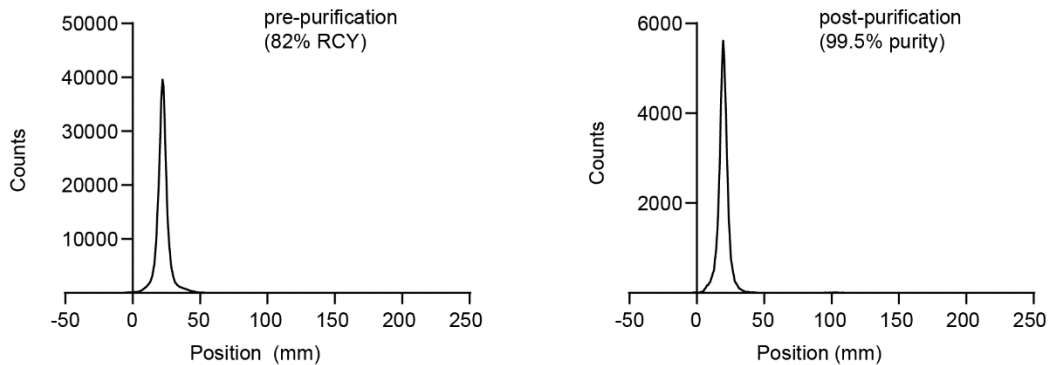

**Figure S1. Mass spectrometry results show GC33 and IgG1 were successfully chelated with Macropa prior to radiolabeling. A.** Mass spectrogram demonstrates multiple peaks with molecular weights ranging from 148,182.90 g/mol to 155,255.60 g/mol, representing conjugates with 7-12 Macropa per GC33 (148,184 g/mol). Radio instant thin layer chromatography tracings show excellent radiochemical yields and purity following size-exclusion chromatography of **B**, [<sup>225</sup>Ac]Ac-Macropa-GC33 and **C**, [<sup>225</sup>Ac]Ac-Macropa-IgG1.

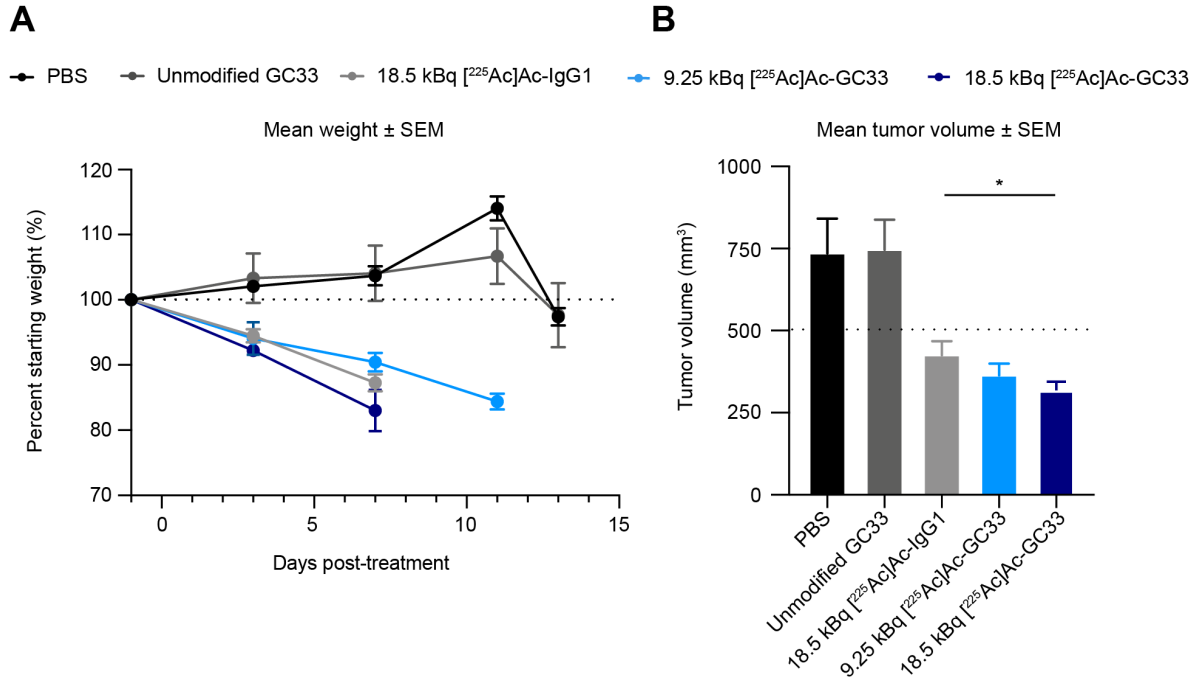

**Figure S2. Animals receiving any radioconjugate experienced weight loss following treatment, while tumor burden analysis at day 7 p.i. suggests preferential tumor response.** **A.** Notable decrease in weights were noted in all groups receiving any radioconjugate. Dashed line denotes starting weight. **B.** Mean tumor volumes as of day 7 p.i. demonstrate that there is a notable treatment response in all animals receiving either radioconjugate compared to PBS and unmodified GC33 controls. However, a Student's t-test shows that the 18.5 kBq [<sup>225</sup>Ac]Ac-Macropa-IgG1 treatment group had larger average tumor volume at 7 days p.i. (425.2 mm<sup>3</sup>, 95% CI: 329.1-521.2) than the 18.5 kBq [<sup>225</sup>Ac]Ac-Macropa-GC33 (318.0 mm<sup>3</sup>, 95% CI: 258.7-377.3) group (p=0.0456). Dashed line denotes the 500 mm<sup>3</sup> tumor volume threshold used to compare treatment cohorts at 7 days p.i. Statistical significance was defined by p < 0.05 (\*), 0.01 (\*\*), 0.001 (\*\*\*), 0.0001 (\*\*\*\*).
